# Supplementary material
Source: publisher figshare collection journal article supplement (https://acs.figshare.com/ndownloader/files/3878434)
Supplement: Supplementary file 1 [file 3878434]

## **Supporting Information**

### **Application of Carbon Nanotubes Coated Electrodes and Immobilized TiO<sub>2</sub> for Dye Degradation in a Continuous Photocatalytic-Electro-Fenton Process**

**Elmira Pajootan, Mokhtar Arami\*, and Mehdi Rahimdokht**

Textile Engineering Department, Amirkabir University of Technology, 424  
Hafez Ave, Tehran, 15875-4413, Iran

#### **Corresponding Author**

\* Mokhtar Arami, Tel: +98 2164542614, Fax: +98 2166400245, Email:  
arami@aut.ac.ir.

**Table S1. Studies Using Various Electrodes Modified with CNTs**

| order | electrode type                 | modification method                                                                                                                                                                                                | application                                              | ref. |
|-------|--------------------------------|--------------------------------------------------------------------------------------------------------------------------------------------------------------------------------------------------------------------|----------------------------------------------------------|------|
| 1     | pencil graphite (PG)           | Immersed into Eppendorf tubes that contained 110 $\mu$ L of 3000 $\mu$ g/mL CNTs solution for 1 h in order to form a thin CNTs layer on the PG surface by wet-adsorption                                           | monitoring the interaction between 4-Nonylphenol and DNA | 1    |
| 2     | fluorine doped tin oxide (FTO) | a) Chemical, b) Thermal chemical vapor deposition and c) Plasma enhanced chemical vapor deposition                                                                                                                 | solar cells                                              | 2    |
| 3     | glassy carbon                  | Polishing with alumina slurries, washing and sonicating. then 1 mg/mL CNTs:H <sub>2</sub> SO <sub>4</sub> was cast on the electrode surface and dried at 200 °C for 3 h                                            | NADH detection                                           | 3    |
| 4     | glassy carbon disk (GCD)       | Dispersion of CNTs in 1 mL DMF was cast on GCD and dried at room temperature                                                                                                                                       | electrochemical detection of trace insulin               | 4    |
| 5     | glassy carbon                  | Dispersion of CNTs in 1 mL dimethylformamide and dried at room temperature                                                                                                                                         | detection of 2,4,6-trinitrotoluene                       | 5    |
| 6     | carbon fiber                   | Dipping the electrode into DMF solution containing 4 mg/mL CNTs for 20 s, drying for 30 min, followed by three, 2 s dippings (with an intermediate 10 min drying)                                                  | determination of hydrogen sulfide                        | 6    |
| 7     | glassy carbon                  | 1 mg CNTs was dispersed in an aqueous 0.1% Nafion solution and was dropped on the GC electrode surface and then the solvent was evaporated under an infrared heat lamp                                             | detection of phenolic estrogenic compounds               | 7    |
| 8     | graphite powder                | Graphite powder, CNTs and mineral oil were mixed. Then the osmium redox polymer (10 mg/mL) was spread over its surface. The cellular paste was spread on the electrode and it was covered with a dialysis membrane | microbial biosensor                                      | 8    |
| 9     | edge plane pyrolytic graphite  | Dropping the dispersion of CNTs onto the polished electrode                                                                                                                                                        | determination of paracetamol                             | 9    |
| 10    | pyrolytic graphite             | Carboxylated CNTs dispersion was cast onto the surface of a polished (PG)                                                                                                                                          | reduction of nitrobenzene                                | 10   |
| 11    | graphite plates                | Two components of epoxy conductive adhesive were blended on graphite plates. CNTs and carbon nanopowder were sprayed separately on the electrodes and dried                                                        | enhanced power generation                                | 11   |
| 12    | graphite plates                | Ultrasonication of solution containing CNTs/CTAB and further electrodeposition using DC voltage of 17.5 (V)                                                                                                        | methylene blue detection and enhanced capacity           | 12   |

**Table S2. Studies Used Modified Graphite Electrodes for Electrochemical Wastewater Treatment**

| order | graphite type               | used as              | modified with                                                   | modification method                                                                                                                                                                                                                                                                                                             | pollutant                                                                                           | ref. |
|-------|-----------------------------|----------------------|-----------------------------------------------------------------|---------------------------------------------------------------------------------------------------------------------------------------------------------------------------------------------------------------------------------------------------------------------------------------------------------------------------------|-----------------------------------------------------------------------------------------------------|------|
| 1     | graphite                    | cathode              | polypyrrole/<br>anthraquinone<br>disulphonate<br>composite film | —                                                                                                                                                                                                                                                                                                                               | amaranth azo<br>dye                                                                                 | 13   |
| 2     | commercial<br>graphite felt | cathode              | —                                                               | Anodization in a phosphate buffer (pH=6.88) at 1.8V vs. SCE for 5 min, followed by cathodization at -1.5V vs. SCE for 1 min/ Dipping the graphite in a solution 0.5 M of H <sub>2</sub> SO <sub>4</sub> for 30 min                                                                                                              | wastewater from the<br>regeneration of<br>ion-exchange<br>resin towers by a<br>chemical<br>industry | 14   |
| 3     | graphite<br>felt            | cathode              | —                                                               | Electrochemically oxidized in H <sub>2</sub> SO <sub>4</sub> solution                                                                                                                                                                                                                                                           | drinking water                                                                                      | 15   |
| 4     | graphite<br>powder          | cathode              | polytetrafluoro<br>ethylene<br>(PTFE)                           | Graphite powder and PTFE dispersion were mixed and ethanol was added as solvent at 80 °C. Then it was pulverized to form a sheet which was pressed onto a stainless steel mesh under a pressure of 15 MPa for 3 min. Then it was calcined at 300 °C for 2h and immersed in acetone and water five times, followed by air drying | C.I. Acid Red 2                                                                                     | 16   |
| 5     | expanded<br>graphite        | anode                | Attapulgit                                                      | The dispersed acid activated attapulgit was added to expanded graphite and dried at 105 °C for 3 h, and pressed with a performing machine                                                                                                                                                                                       | textile<br>wastewater                                                                               | 17   |
| 6     | CNTs or<br>graphite         | cathode              | nitrogen<br>functionalized<br>CNTs                              | CNTs (or graphite) and PTFE were dispersed. Ethanol was added as solvent and mixed at 80 °C. PTFE cake was pulverized to form a thin film and pressed onto stainless steel mesh under the pressure of 15MPa for 3 min                                                                                                           | methyl orange                                                                                       | 18   |
| 7     | expanded<br>graphite        | working<br>electrode | palygorskite                                                    | EG and paraffin and palygorskite were mixed and heated to 65 °C to melt the paraffin. Then it was filled into a glass tube                                                                                                                                                                                                      | phenol                                                                                              | 19   |
| 8     | graphite<br>plates          | cathode              | activated<br>carbon- PTFE<br>or carbon<br>nanotube-<br>PTFE     | Activated carbon or carbon nanotube, PTFE (0.84 g), distilled water and n-butanol were mixed, heated at 80 °C and sintered at 350 °C for 15 min                                                                                                                                                                                 | C.I. Acid<br>Yellow 36                                                                              | 20   |
| 9     | graphite<br>plate           | cathode              | CNTs                                                            | Ultrasonication of solution containing CNTs/CTAB and further electrodeposition using DC voltage of 17.5 (V)                                                                                                                                                                                                                     | Acid Red 14,<br>Acid Blue 92                                                                        | 21   |

**Table S3. Dyes Structures**

|                                                                                   |                                                                                                                                                                                   |
|-----------------------------------------------------------------------------------|-----------------------------------------------------------------------------------------------------------------------------------------------------------------------------------|
| 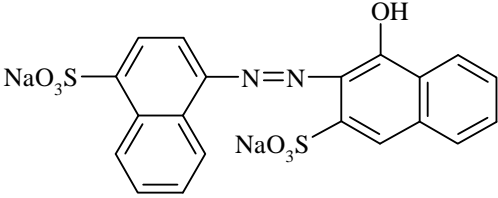 | <p>C.I. Acid Red 14<br/>(<math>\text{C}_{20}\text{H}_{12}\text{N}_2\text{O}_7\text{S}_2 \cdot 2\text{Na}</math>)<br/><math>\lambda_{\text{max}} = 515 \text{ (nm)}</math></p>     |
|  | <p>C.I. Acid Blue 92<br/>(<math>\text{C}_{26}\text{H}_{16}\text{N}_3\text{O}_{10}\text{S}_3 \cdot 3\text{Na}</math>)<br/><math>\lambda_{\text{max}} = 572 \text{ (nm)}</math></p> |

**Table S4. CCD Matrix for the PEF-TiO<sub>2</sub> Process**

| run order | parameters                        |                                                  |                                                 |                                                 | Na <sub>2</sub> SO <sub>4</sub> as electrolyte |       |                       |                                | NaCl as electrolyte   |       |                       |                                |
|-----------|-----------------------------------|--------------------------------------------------|-------------------------------------------------|-------------------------------------------------|------------------------------------------------|-------|-----------------------|--------------------------------|-----------------------|-------|-----------------------|--------------------------------|
|           | time<br>(X <sub>1</sub> ,<br>min) | [Fe <sup>3+</sup> ]<br>(X <sub>2</sub> ,<br>mM ) | CD<br>(X <sub>3</sub> ,<br>mA/cm <sup>2</sup> ) | [C <sub>0</sub> ]<br>(X <sub>4</sub> ,<br>mg/L) | decolorization<br>(%)                          |       | COD<br>removal<br>(%) | EEC<br>(kWh/g <sub>COD</sub> ) | decolorization<br>(%) |       | COD<br>removal<br>(%) | EEC<br>(kWh/g <sub>COD</sub> ) |
|           |                                   |                                                  |                                                 |                                                 | AR14                                           | AB92  |                       |                                | AR14                  | AB92  |                       |                                |
| 1         | 120                               | 0.15                                             | 12.95                                           | 50                                              | 72.18                                          | 60.30 | 62.88                 | 0.426                          | 79.68                 | 85.31 | 70.71                 | 0.378                          |
| 2         | 100                               | 0.2                                              | 15.30                                           | 70                                              | 67.51                                          | 35.44 | 53.77                 | 0.320                          | 67.10                 | 68.89 | 58.56                 | 0.294                          |
| 3         | 80                                | 0.05                                             | 12.95                                           | 50                                              | 47.64                                          | 50.70 | 40.27                 | 0.443                          | 57.00                 | 68.54 | 50.93                 | 0.350                          |
| 4         | 80                                | 0.15                                             | 12.95                                           | 50                                              | 69.04                                          | 58.79 | 55.76                 | 0.320                          | 70.42                 | 82.96 | 64.59                 | 0.276                          |
| 5         | 60                                | 0.2                                              | 10.60                                           | 70                                              | 43.15                                          | 40.65 | 37.01                 | 0.246                          | 53.35                 | 58.01 | 48.02                 | 0.190                          |
| 6         | 100                               | 0.2                                              | 10.60                                           | 30                                              | 73.27                                          | 71.59 | 63.99                 | 0.526                          | 79.01                 | 70.24 | 69.84                 | 0.482                          |
| 7         | 60                                | 0.1                                              | 10.60                                           | 70                                              | 45.51                                          | 28.01 | 37.09                 | 0.246                          | 44.66                 | 45.42 | 38.57                 | 0.236                          |
| 8         | 60                                | 0.2                                              | 15.30                                           | 70                                              | 60.70                                          | 23.68 | 49.71                 | 0.207                          | 57.67                 | 60.08 | 50.30                 | 0.205                          |
| 9         | 40                                | 0.15                                             | 12.95                                           | 50                                              | 62.48                                          | 33.93 | 50.99                 | 0.175                          | 57.48                 | 47.10 | 52.13                 | 0.171                          |
| 10        | 80                                | 0.15                                             | 8.25                                            | 50                                              | 56.63                                          | 36.16 | 46.85                 | 0.333                          | 55.07                 | 73.13 | 52.89                 | 0.295                          |
| 11        | 60                                | 0.1                                              | 10.60                                           | 30                                              | 69.64                                          | 27.11 | 43.78                 | 0.461                          | 58.52                 | 71.59 | 53.37                 | 0.378                          |
| 12        | 80                                | 0.15                                             | 12.95                                           | 10                                              | 79.89                                          | 65.64 | 77.32                 | 0.900                          | 80.50                 | 92.92 | 87.35                 | 0.758                          |
| 13        | 80                                | 0.15                                             | 17.65                                           | 50                                              | 62.57                                          | 19.74 | 52.54                 | 0.381                          | 65.46                 | 78.64 | 58.42                 | 0.343                          |
| 14        | 80                                | 0.15                                             | 12.95                                           | 50                                              | 69.94                                          | 56.79 | 54.73                 | 0.326                          | 71.55                 | 83.09 | 63.87                 | 0.279                          |
| 15        | 80                                | 0.15                                             | 12.95                                           | 50                                              | 71.24                                          | 56.05 | 55.57                 | 0.321                          | 69.54                 | 81.44 | 63.01                 | 0.283                          |
| 16        | 80                                | 0.15                                             | 12.95                                           | 50                                              | 68.84                                          | 57.93 | 54.89                 | 0.325                          | 72.83                 | 83.68 | 65.65                 | 0.272                          |
| 17        | 80                                | 0.15                                             | 12.95                                           | 50                                              | 70.58                                          | 55.99 | 56.51                 | 0.316                          | 70.90                 | 82.53 | 64.93                 | 0.275                          |
| 18        | 60                                | 0.2                                              | 15.30                                           | 30                                              | 67.24                                          | 28.25 | 53.77                 | 0.425                          | 84.18                 | 56.37 | 75.96                 | 0.301                          |
| 19        | 100                               | 0.1                                              | 15.30                                           | 30                                              | 62.78                                          | 55.69 | 52.69                 | 0.723                          | 63.89                 | 98.26 | 60.03                 | 0.634                          |
| 20        | 80                                | 0.25                                             | 12.95                                           | 50                                              | 52.13                                          | 64.96 | 47.35                 | 0.377                          | 72.68                 | 49.85 | 65.98                 | 0.270                          |
| 21        | 80                                | 0.15                                             | 12.95                                           | 50                                              | 71.22                                          | 59.29 | 56.53                 | 0.316                          | 70.42                 | 82.96 | 64.17                 | 0.278                          |
| 22        | 60                                | 0.1                                              | 15.30                                           | 70                                              | 55.11                                          | 20.78 | 41.71                 | 0.247                          | 47.64                 | 45.24 | 41.47                 | 0.249                          |
| 23        | 100                               | 0.2                                              | 15.30                                           | 30                                              | 77.33                                          | 40.93 | 67.51                 | 0.574                          | 87.67                 | 68.79 | 78.32                 | 0.486                          |
| 24        | 100                               | 0.2                                              | 10.60                                           | 70                                              | 64.18                                          | 62.56 | 54.50                 | 0.279                          | 63.62                 | 69.05 | 57.58                 | 0.264                          |
| 25        | 60                                | 0.2                                              | 10.60                                           | 30                                              | 49.98                                          | 32.09 | 41.51                 | 0.486                          | 74.66                 | 54.16 | 66.74                 | 0.303                          |
| 26        | 80                                | 0.15                                             | 12.95                                           | 90                                              | 58.19                                          | 45.54 | 38.25                 | 0.316                          | 57.50                 | 69.49 | 38.57                 | 0.329                          |
| 27        | 60                                | 0.1                                              | 15.30                                           | 30                                              | 63.23                                          | 44.27 | 51.99                 | 0.439                          | 58.47                 | 86.56 | 54.75                 | 0.417                          |
| 28        | 100                               | 0.1                                              | 10.60                                           | 70                                              | 54.53                                          | 46.06 | 44.73                 | 0.340                          | 55.63                 | 62.73 | 49.84                 | 0.305                          |
| 29        | 80                                | 0.15                                             | 12.95                                           | 50                                              | 69.19                                          | 57.32 | 54.75                 | 0.326                          | 70.81                 | 81.56 | 64.63                 | 0.276                          |
| 30        | 100                               | 0.1                                              | 10.60                                           | 30                                              | 73.15                                          | 43.24 | 58.68                 | 0.573                          | 62.37                 | 96.97 | 60.24                 | 0.559                          |
| 31        | 100                               | 0.1                                              | 15.30                                           | 70                                              | 56.49                                          | 27.43 | 44.84                 | 0.383                          | 59.38                 | 66.33 | 53.51                 | 0.321                          |

**Table S5. Coefficients of Significant Factors to the Response Functions**

|    |                                       | Na <sub>2</sub> SO <sub>4</sub> as electrolyte |         |                 |                             | NaCl as electrolyte |          |                 |                             |
|----|---------------------------------------|------------------------------------------------|---------|-----------------|-----------------------------|---------------------|----------|-----------------|-----------------------------|
|    |                                       | decolorization (%)                             |         | COD removal (%) | EEC (kWh/g <sub>COD</sub> ) | decolorization (%)  |          | COD removal (%) | EEC (kWh/g <sub>COD</sub> ) |
|    |                                       | AR14                                           | AB92    |                 |                             | AR14                | AB92     |                 |                             |
| 1  | constant                              | 70.0098                                        | 57.449  | 55.5354         | 0.321289                    | 70.9244             | 82.606   | 64.4081         | 0.277022                    |
| 2  | t                                     | 3.9193                                         | 7.952   | 4.4963          | 0.060836                    | 4.3298              | 8.3434   | 3.9963          | 0.061671                    |
| 3  | [Fe <sup>3+</sup> ]                   | 1.3279                                         | 2.964   | 2.5169          | -0.02007                    | 6.1699              | -4.3704  | 5.1527          | -0.03067                    |
| 4  | CD                                    | 2.0362                                         | -4.487  | 1.9206          | 0.010682                    | 2.2897              | 1.3907   | 1.6565          | 0.011899                    |
| 5  | [C <sub>0</sub> ]                     | -5.5355                                        | -4.114  | -6.1948         | -0.1295                     | -6.9051             | -7.2509  | -9.1237         | -0.09811                    |
| 6  | t <sup>2</sup>                        | -0.6666*                                       | -3.898  | -0.0215*        | -0.00761*                   | -0.9296*            | -4.6345  | -1.1315*        | -0.00229*                   |
| 7  | [Fe <sup>3+</sup> ] <sup>2</sup>      | -5.0272                                        | -1.219* | -3.302          | 0.019797                    | -1.8638             | -6.387   | -1.8723         | 0.006594                    |
| 8  | CD <sup>2</sup>                       | -2.5977                                        | -8.689  | -1.8309         | 0.006632*                   | -3.0085             | -2.2137  | -2.5721         | 0.008762                    |
| 9  | [C <sub>0</sub> ] <sup>2</sup>        | -0.2389*                                       | -1.779* | 0.1916*         | 0.069324                    | -0.8236*            | -0.8836* | -0.7458*        | 0.064813                    |
| 10 | t.[Fe <sup>3+</sup> ]                 | 2.9847                                         | 2.1*    | 1.9627          | -0.01826                    | -0.278*             | -1.6945  | -0.7612*        | -0.0007*                    |
| 11 | t.CD                                  | -2.4391                                        | -3.317  | -2.5549         | 0.025156                    | 0.0393*             | -0.9881* | -0.1788*        | 0.003836*                   |
| 12 | t.[C <sub>0</sub> ]                   | 0.1129*                                        | -1.335* | -1.218*         | -0.0131                     | 1.5816              | -0.4572* | 1.469*          | -0.02865                    |
| 13 | [Fe <sup>3+</sup> ].CD                | 2.9634                                         | -5.145  | 1.2996*         | -0.01149*                   | 1.1102*             | -1.0628* | 0.8275*         | -0.006*                     |
| 14 | [Fe <sup>3+</sup> ].[C <sub>0</sub> ] | 1.5555                                         | 2.343*  | 0.4361*         | 0.001357*                   | -2.9897             | 8.758    | -1.9636         | 0.016154                    |
| 15 | CD.[C <sub>0</sub> ]                  | 1.7446                                         | -4.067  | -0.082*         | -0.00416*                   | -0.3201*            | -0.7311* | -0.5638*        | -0.00272*                   |

\* The insignificant parameters

**Table S6. Comparison of the Present Study with Other Researches**

|   | treatment method     | pollutant                                 | reactor                             | electrode material                                                                                                             | electrolyte                                                          | flow rate or time | CD (mA/cm <sup>2</sup> )   | decolorization (%)         | ref.       |
|---|----------------------|-------------------------------------------|-------------------------------------|--------------------------------------------------------------------------------------------------------------------------------|----------------------------------------------------------------------|-------------------|----------------------------|----------------------------|------------|
| 1 | PEF-TiO <sub>2</sub> | Acid Red 14 (6 mg/L)                      | batch (1 L)                         | anode: Pt sheet<br>cathode: graphite-CNTs/<br>immobilized TiO <sub>2</sub> on sand blasted glass plates by sol-gel dip-coating | Na <sub>2</sub> SO <sub>4</sub> 0.05 M/<br>Fe <sup>3+</sup> 0.2 mM   | 120 min           | 2.77                       | 99                         | 22         |
| 2 | Electro-Fenton       | simulated industrial textile wastewater   | continuous (1.8 L)                  | anode: iron<br>cathode: stainless steel                                                                                        | NaCl 25 g/L                                                          | 0.33 L/h          | 123.97                     | 99.3                       | 23         |
| 3 | PEF-TiO <sub>2</sub> | Direct Yellow 12 (50 mg/L)                | batch (2.5 L)                       | anode: Pt sheet<br>cathode: CNT-PTFE/<br>immobilized ZnO nanoparticles on glass plates                                         | Na <sub>2</sub> SO <sub>4</sub> 0.05 M/<br>Fe <sup>3+</sup> 0.2 mM   | 70 min            | 34.78                      | 97                         | 24         |
| 4 | Electro-Fenton       | Lissamine Green B (8.5 mg/L)              | continuous bubble reactor (0.675 L) | anode, cathode: graphite bars (surface area of 1.27 cm <sup>2</sup> )                                                          | Na <sub>2</sub> SO <sub>4</sub> 0.01 M/<br>Fe <sup>2+</sup> 150 mg/L | 0.048 L/h         | potential difference (15V) | 80                         | 25         |
| 5 | PEF-TiO <sub>2</sub> | Acid Red 14 and Acid Blue 92 (48.70 mg/L) | continuous bubble reactor (1 L)     | anode: graphite<br>cathode: graphite-CNTs/<br>immobilized TiO <sub>2</sub> on UV resistant silicone polymer                    | NaCl 1 g/L/<br>Fe <sup>3+</sup> 0.15 mM                              | 0.825 L/h         | 12.95                      | AR14: 94.47<br>AB92: 98.98 | this study |

For the binary solutions, the extension of Beer-Lambert law (eq S1) was used:<sup>26,27</sup>

$$A_{\lambda_j} = \sum_{i=1}^2 \varepsilon_{\lambda_j}^i C^i L \quad (\text{S1})$$

in which,  $A_{\lambda_j}$  is the absorbance of a mixture of 2 components at the  $j$ th wavelength,  $C^i$  is the concentration of the  $i$ th component,  $\varepsilon_{\lambda_j}^i$  is the extinction coefficient of the  $i$ th component at the  $j$ th wavelength, and  $L$  is the cell path length. According to this expression, two equations and two readings of absorbance at two different wavelengths are needed to determine the concentration of two dyes in a mixture. Finally, the involving of the resolution of a matrix system is expressed as eq S2 (assuming  $L = 1$  cm):<sup>26,27</sup>

$$\begin{bmatrix} A_{\lambda_R} \\ A_{\lambda_B} \end{bmatrix} = \begin{bmatrix} \varepsilon_{\lambda_R}^R & \varepsilon_{\lambda_R}^B \\ \varepsilon_{\lambda_B}^R & \varepsilon_{\lambda_B}^B \end{bmatrix} \times \begin{bmatrix} C^R \\ C^B \end{bmatrix} \quad (\text{S2})$$

The resolution of this two-equation system gives the expressions (eq S3) for the calculation of the concentrations of AR14 ( $C^R$ ) and AB92 ( $C^B$ ) in the mixture:<sup>26,27</sup>

$$C^B = \frac{A_{\lambda_B} \varepsilon_{\lambda_R}^R - A_{\lambda_R} \varepsilon_{\lambda_B}^R}{\varepsilon_{\lambda_B}^B \varepsilon_{\lambda_R}^R - \varepsilon_{\lambda_R}^B \varepsilon_{\lambda_B}^R}; \quad C^R = \frac{A_{\lambda_R} \varepsilon_{\lambda_B}^B - A_{\lambda_B} \varepsilon_{\lambda_R}^B}{\varepsilon_{\lambda_B}^B \varepsilon_{\lambda_R}^R - \varepsilon_{\lambda_R}^B \varepsilon_{\lambda_B}^R} \quad (\text{S3})$$



## REFERENCES

- (1) Karadeniz, H.; Caliskan, A.; Uguz, C. Electrochemical monitoring of the interaction between 4-nonylphenol and DNA by graphite and carbon nanotube modified graphite electrodes. *Anal. Sci.* **2010**, *26*, 1065-9.
- (2) Bissett, M.; Barlow, A.; Shearer, C.; Quinton, J.; Shapter, J. G. Comparison of carbon nanotube modified electrodes for photovoltaic devices. *Carbon* **2012**, *50*, 2431-2441.
- (3) Musameh, M.; Wang, J.; Merkoci, A.; Lin, Y. Low-potential stable NADH detection at carbon-nanotube-modified glassy carbon electrodes. *Electrochem. Commun.* **2002**, *4*, 743-746.
- (4) Wang, J.; Musameh, M. Electrochemical detection of trace insulin at carbon-nanotube-modified electrodes. *Anal. Chim. Acta* **2004**, *511*, 33-36.
- (5) Wang, J.; Hocesvar, S. B.; Ogorevc, B. Carbon nanotube-modified glassy carbon electrode for adsorptive stripping voltammetric detection of ultratrace levels of 2,4,6-trinitrotoluene. *Electrochem. Commun.* **2004**, *6*, 176-179.
- (6) Lawrence, N. S.; Deo, R. P.; Wang, J. Electrochemical determination of hydrogen sulfide at carbon nanotube modified electrodes. *Anal. Chim. Acta* **2004**, *517*, 131-137.
- (7) Vega, D.; Agüí, L.; González-Cortés, A.; Yáñez-Sedeño, P.; Pingarrón, J. M. Electrochemical detection of phenolic estrogenic compounds at carbon nanotube-modified electrodes. *Talanta* **2007**, *71*, 1031-1038.
- (8) Timur, S.; Anik, U.; Odaci, D.; Gorton, L. Development of a microbial biosensor based on carbon nanotube (CNT) modified electrodes. *Electrochem. Commun.* **2007**, *9*, 1810-1815.
- (9) Goyal, R. N.; Gupta, V. K.; Chatterjee, S. Voltammetric biosensors for the determination of paracetamol at carbon nanotube modified pyrolytic graphite electrode. *Sens. Actuators, B* **2010**, *149*, 252-258.
- (10) Li, Y.-P.; Cao, H.-B.; Liu, C.-M.; Zhang, Y. Electrochemical reduction of nitrobenzene at carbon nanotube electrode. *J. Hazard. Mater.* **2007**, *148*, 158-163.
- (11) Mohanakrishna, G.; Krishna Mohan, S.; Venkata Mohan, S. Carbon based nanotubes and nanopowder as impregnated electrode structures for enhanced power generation: Evaluation with real field wastewater. *Appl. Energy* **2012**, *95*, 31-37.

- (12) Pajootan, E.; Arami, M. Structural and electrochemical characterization of carbon electrode modified by multi-walled carbon nanotubes and surfactant. *Electrochim. Acta* **2013**, *112*, 505-514.
- (13) Zhang, G.; Yang, F.; Gao, M.; Fang, X.; Liu, L. Electro-Fenton degradation of azo dye using polypyrrole/anthraquinonedisulphonate composite film modified graphite cathode in acidic aqueous solutions. *Electrochim. Acta* **2008**, *53*, 5155-5161.
- (14) Panizza, M.; Cerisola, G. Removal of organic pollutants from industrial wastewater by electrogenerated Fenton's reagent. *Water Res.* **2001**, *35*, 3987-3992.
- (15) Miao, J.; Zhu, H.; Tang, Y.; Chen, Y.; Wan, P. Graphite Felt electrochemically modified in H<sub>2</sub>SO<sub>4</sub> solution used as a cathode to produce H<sub>2</sub>O<sub>2</sub> for pre-oxidation of drinking water. *Chem. Eng. J.*
- (16) Zhou, M.; Yu, Q.; Lei, L. The preparation and characterization of a graphite-PTFE cathode system for the decolorization of C.I. Acid Red 2. *Dyes Pigm.* **2008**, *77*, 129-136.
- (17) Kong, Y.; Yuan, J.; Wang, Z.; Yao, S.; Chen, Z. Application of expanded graphite/attapulgitite composite materials as electrode for treatment of textile wastewater. *Appl. Clay Sci.* **2009**, *46*, 358-362.
- (18) Zhang, X.; Fu, J.; Zhang, Y.; Lei, L. A nitrogen functionalized carbon nanotube cathode for highly efficient electrocatalytic generation of H<sub>2</sub>O<sub>2</sub> in Electro-Fenton system. *Sep. Purif. Technol.* **2008**, *64*, 116-123.
- (19) Kong, Y.; Chen, X.; Ni, J.; Yao, S.; Wang, W.; Luo, Z.; Chen, Z. Palygorskite-expanded graphite electrodes for catalytic electro-oxidation of phenol. *Appl. Clay Sci.* **2010**, *49*, 64-68.
- (20) Khataee, A. R.; Safarpour, M.; Zarei, M.; Aber, S. Combined heterogeneous and homogeneous photodegradation of a dye using immobilized TiO<sub>2</sub> nanophotocatalyst and modified graphite electrode with carbon nanotubes. *J. Mol. Catal. A: Chem.* **2012**, *363-364*, 58-68.
- (21) Pajootan, E.; Arami, M.; Rahimdokht, M. Discoloration of wastewater in a continuous electro-Fenton process using modified graphite electrode with multi-walled carbon nanotubes/surfactant. *Sep. Purif. Technol.* **2014**, *130*, 34-44.
- (22) Khataee, A. R.; Safarpour, M.; Naseri, A.; Zarei, M. Photoelectro-Fenton/nanophotocatalysis decolorization of three textile dyes mixture: Response surface

- modeling and multivariate calibration procedure for simultaneous determination. *J. Electroanal. Chem.* **2012**, 672, 53-62.
- (23) Körbahti, B. K.; Tanyolaç, A. Continuous electrochemical treatment of simulated industrial textile wastewater from industrial components in a tubular reactor. *J. Hazard. Mater.* **2009**, 170, 771-778.
- (24) Khataee, A. R.; Zarei, M. Photoelectrocatalytic decolorization of diazo dye by zinc oxide nanophotocatalyst and carbon nanotube based cathode: Determination of the degradation products. *Desalination* **2011**, 278, 117-125.
- (25) Rosales, E.; Pazos, M.; Longo, M. A.; Sanromán, M. A. Electro-Fenton decoloration of dyes in a continuous reactor: A promising technology in colored wastewater treatment. *Chem. Eng. J.* **2009**, 155, 62-67.
- (26) Hornero-Méndez, D.; Mínguez-Mosquera, M. I. Rapid spectrophotometric determination of red and Yellow Isochromic Carotenoid Fractions in Paprika and Red Pepper Oleoresins. *J. Agric. Food. Chem.* **2001**, 49, 3584-3588.
- (27) Pajootan, E.; Arami, M.; Mahmoodi, N. M. Binary system dye removal by electrocoagulation from synthetic and real colored wastewaters. *J. Taiwan Inst. Chem. Eng.* **2012**, 43, 282-290.
